# Supplementary material
Source: publisher site journal article supplement (https://www.dovepress.com/article/365852)
Supplement: Supplementary file 1 [file get_supplementary_file.php]

**Supplementary questionnaire**

**INFORMED CONSENT**

I have read or obtained a clear explanation, am fully aware of and understand the objectives, benefits, and risks that may arise in the research, and have been given the opportunity to ask questions and have them answered satisfactorily. I may withdraw and discontinue participation at any time without penalty. My participation in this project is voluntary. I understand that my data will be kept confidential and only be used for research.

Then, I

❒ Agree

❒ Disagree

to participate in this research, entitled:

“**KNOWLEDGE, ATTITUDES, AND PREVENTATIVE BEHAVIOR TOWARD TUBERCULOSIS IN UNIVERSITY STUDENTS IN INDONESIA”**

I have been given a copy of this consent form.

| **Date:** |
| --- |
| **Full name:** |
| **Phone/e-mail:** |

For further information, please contact:

Irma Melyani Puspitasari ([irma.melyani@unpad.ac.id](mailto:irma.melyani@unpad.ac.id))

Rano Kurnia Sinuraya ([r.k.sinuraya@unpad.ac.id](mailto:r.k.sinuraya@unpad.ac.id))

Arini Nurhaqiqi Aminudin ([arini17003@mail.unpad.ac.id](mailto:arini17003@mail.unpad.ac.id))

Rika Rahmi Kamilah ([rika17001@mail.unpad.ac.id](mailto:rika17001@mail.unpad.ac.id))

Submit

The information described below provides the questionnaire used in this study.

[Backgrounds]

| Student’s ID Number | : |  |
| --- | --- | --- |
| Sex | : | (  ) Male                                   (  ) Female |
| Age | : | (  )  ≥20 years old                    (  ) <20 years old |
| Faculty | : | (  ) Health faculties (  ) Non-health faculties |
| Academic degree | : | (  ) Postgraduate                     (  ) Graduate |
| Year began university | : | (  ) 2016  (  ) 2017  (  ) 2018  (  ) 2019  (  ) 2020  (  ) 2021 |
| Residence | : | (  ) West Java                                (  ) Outside West Java |
| Smoker | : | (  ) Yes                                            (  ) No |
| Have obtained information about TB | : | (  ) Yes                                            (  ) No |
| Source of information (can choose multiple responses) | : | (  ) Social media  (  ) Formal education  (  ) Internet  (  ) TV  (  ) Healthcare providers  (  ) Relatives  (  ) Others |

[Knowledge]

| Questions | Your response | |
| --- | --- | --- |
| Yes | No |
| Tuberculosis (TB) can occur anywhere in the human body |  |  |
| TB is inherited from parents, so if parents are infected with TB, then their child will definitely get TB |  |  |
| TB bacteria are spread in the air |  |  |
| There are no specific symptoms that appear in the early stages of TB infection |  |  |
| When infected with TB, a person will experience a mild fever in the afternoon |  |  |
| If mild fever persists and is accompanied by weight loss, it may be TB |  |  |
| Chest X-rays are one way to diagnose TB |  |  |
| A single administration of the BCG vaccine can protect against TB infection for a lifetime |  |  |
| TB can only be treated if there are obvious symptoms |  |  |
| TB is treated by taking medication every day for at least six months |  |  |
| TB treatment is difficult, and if anti-TB drugs are not taken regularly, it can lead to drug resistance |  |  |

[Attitudes]

| Questions | Your response | | | |
| --- | --- | --- | --- | --- |
| SA | A | DA | SDA |
| If I got TB, I should immediately inform my family and/or my lecturers |  |  |  |  |
| I think TB can be transmitted without even realizing it. |  |  |  |  |
| I may experience obstacles in my family and academic life if I were infected with TB |  |  |  |  |
| I think that TB is a very serious disease |  |  |  |  |
| I think, regular medical examinations every year can prevent TB |  |  |  |  |
| I think a person should be examined for TB if there is a TB patient among his family or friends |  |  |  |  |
| TB screening can be easily accessed at health facilities such as community health centers (Puskesmas) |  |  |  |  |
| If I were diagnosed with TB I would take anti-TB drugs regularly for at least six months, as directed by the doctor |  |  |  |  |
| If a friend discontinued taking anti-TB drugs, I would persuade him to continue regular TB treatment |  |  |  |  |
| I would encourage those with TB around me to obtain treatment |  |  |  |  |
| I think TB can be cured if it is detected and treated early |  |  |  |  |
| I am interested in finding out more about TB disease |  |  |  |  |
| I think education about TB is very much needed |  |  |  |  |

**Abbreviations:** SA = Strongly agree; A = Agree; DA = Disagree; SDA = Strongly disagree

[Preventative behavior]

| Questions | Your response | | | |
| --- | --- | --- | --- | --- |
| SA | A | DA | SDA |
| When I sneeze or cough, I cover my mouth |  |  |  |  |
| I often open the window for good air circulation |  |  |  |  |
| I cover my mouth with a handkerchief or tissue when I cough |  |  |  |  |
| I have regular chest x-rays every year |  |  |  |  |
| If I had a cough for more than two weeks, I would go to a community health center, medical clinic, or hospital to get myself checked |  |  |  |  |
| I often read materials designed to raise awareness about TB |  |  |  |  |
| I actively participate in education about TB |  |  |  |  |
| I usually eat a balanced nutritious meal to maintain health |  |  |  |  |
| I don't overeat because it can influence my immune system and overall health |  |  |  |  |
| I wash my hands after going out or exercising |  |  |  |  |
| I exercise regularly to maintain good health |  |  |  |  |

**Abbreviations:** SA = Strongly agree; A = Agree; DA = Disagree; SDA = Strongly disagree
